## **Title: Silent recognition of flagellins from human gut commensal bacteria by Toll-like receptor 5**

**Authors:** Sara J. Clasen<sup>1</sup>, Michael E. W. Bell<sup>1</sup>, Du-Hwa Lee<sup>2</sup>, Zachariah M. Henseler<sup>1</sup>, Andrea Borbón<sup>1</sup>, Jacobo de la Cuesta-Zuluaga<sup>1</sup>, Katarzyna Parys<sup>2</sup>, Jun Zou<sup>3</sup>, Nicholas D. Youngblut<sup>1</sup>, Andrew T. Gewirtz<sup>3</sup>, Youssef Belkhadir<sup>2</sup>, Ruth E. Ley<sup>1,4\*</sup>

### **Affiliations:**

<sup>1</sup>Department of Microbiome Science, Max Planck Institute for Biology, Tübingen 72076, Germany.

<sup>2</sup>Gregor Mendel Institute (GMI), Austrian Academy of Sciences, Vienna BioCenter (VBC), Dr. Bohr-Gasse 3, Vienna, Austria.

<sup>3</sup>Center for Inflammation, Immunity and Infection, Institute for Biomedical Sciences, Georgia State University, Atlanta, GA, USA.

<sup>4</sup>Cluster of Excellence EXC 2124 Controlling Microbes to Fight Infections, University of Tübingen, Tübingen, Germany.

\*Corresponding author. Email: [ruth.ley@tuebingen.mpg.de](mailto:ruth.ley@tuebingen.mpg.de)

**Abstract:** Flagellin, the protein unit of the bacterial flagellum, stimulates the innate immune receptor Toll-like receptor (TLR)5 following pattern recognition, or evades TLR5 through lack of recognition. This binary response fails to explain the weak agonism of flagellins from commensal bacteria, raising the question of how TLR5 response is tuned. Here, we describe a novel class of flagellin-TLR5 interaction, termed silent recognition. Silent flagellins are weak agonists despite high affinity binding to TLR5. This dynamic response is tuned by TLR5-flagellin interaction distal to the site of pattern recognition. Silent flagellins are produced primarily by the abundant gut bacteria *Lachnospiraceae* and are enriched in non-Western populations. These findings provide a mechanism for the innate immune system to tolerate commensal-derived flagellins.

**One-Sentence Summary:** TLR5 sensitively recognizes, but responds weakly to, flagellins from gut commensal bacteria.

## 1 **Main Text:**

2           Innate immune responses are initiated by pattern recognition receptors (PRRs) that  
3 evolved to detect conserved microbe-associated molecular patterns (MAMPs) (1). The Toll-  
4 like family of receptors (TLRs) are membrane-bound PRRs, widely expressed in many cell  
5 types, that activate pro-inflammatory pathways following MAMP-binding to their horseshoe-  
6 shaped ectodomains (2). Since MAMPs are not unique to pathogens, a question that has  
7 persisted for decades is whether TLRs respond differently to ligands derived from beneficial  
8 or commensal microbiota, relative to those produced by potentially pathogenic microbes (3).  
9 This question is especially relevant for TLRs that interface with the intestinal microbiota such  
10 as Toll-Like Receptor 5 (TLR5), which is highly expressed by epithelial cells that line  
11 mucosal surfaces (4).

12           TLR5 is plasma membrane-bound and binds extracellular flagellin, the protein subunit  
13 of the bacterial flagellum (5). Phylogenetically diverse bacteria produce structurally similar  
14 flagellins that consist of conserved N- and C-terminal D0-D1 domains separated by a  
15 hypervariable region (Fig. 1A) (6). The MAMP recognized by TLR5 is located in the N-  
16 terminal D1 (nD1) and referred to as the TLR5 epitope (7, 8). Studies on the FliC flagellin  
17 derived from the human pathogen *Salmonella enterica* serovar Typhimurium showed that  
18 mutating key residues in this region (FliC PIM) reduces ligand potency by several orders of  
19 magnitude (Table S1) and abolishes bacterial motility (7); crystal structures of FliC in  
20 complex with *Danio rerio* TLR5 later confirmed a direct interaction between these residues  
21 and the N-terminal region of the receptor ectodomain (9). Furthermore, flagellins that do not  
22 stimulate TLR5, like FlaA from the human pathogen *Helicobacter pylori* ('HpFlaA'), have  
23 different amino acids in their TLR5 epitope site (8, 10). TLR5's inability to respond to  
24 HpFlaA is characterized as 'evasion' and is presumed to occur through loss of TLR5 binding.  
25 Taken together, these studies demonstrate that robust TLR5 signaling requires the receptor  
26 ectodomain to bind the flagellin TLR5 epitope.

27           We quantified TLR5 recognition of flagellin by measuring the relative binding  
28 strength between the receptor and the nD1 epitope using a truncated form of the human  
29 ectodomain, TLR5<sup>N14</sup> (similar to the one used in the crystal structure complex in (9)). This  
30 construct contains the first 14 leucine-rich repeats (LRRs) of the 22 LRRs that compose the  
31 ectodomain, including the flagellin nD1 binding site identified in the crystal structure, flanked  
32 by an N-terminal cap and C-terminal adaptor sequence tagged to IgG-Fc. Binding was  
33 quantified by incubating TLR5<sup>N14</sup> with flagellins expressing C-terminal alkaline phosphatase  
34 (AP) and measuring AP activity. Consistent with its TLR5 epitope directly interacting with  
35 TLR5<sup>N14</sup> (9), FliC binds strongly (Fig. 1B). In contrast, FliC PIM, which lacks three  
36 conserved residues in the epitope, shows a dramatic reduction in binding compared to FliC.  
37 Thus, the FliC-TLR5<sup>N14</sup> interaction is primarily mediated by the nD1 TLR5 epitope, although  
38 a binding interface has been reported for the FliC cD1 domain (9). The D0 domain of FliC  
39 has previously been characterized as unnecessary for binding to TLR5 (9, 11). Consistent  
40 with the prediction that the D0 would not interact with TLR5, and with its retention of the  
41 nD1 epitope, we observed strong binding of FliC  $\Delta$ D0 to TLR5<sup>N14</sup>. *HpFlaA* fails to bind  
42 TLR5<sup>N14</sup>, congruent with its altered TLR5 epitope and reported lack of activation (8, 12) (Fig.  
43 1A,B). These results indicate that TLR5<sup>N14</sup> binding to flagellin reflects pattern recognition by  
44 TLR5 (10).

45           Flagellins have been characterized as either stimulatory (binding TLR5, leading to  
46 activation of the receptor, *e.g.*, FliC), or evasive (no TLR5 activation, *e.g.*, *HpFlaA*) with the  
47 underlying assumption that TLR5 binding leads to activation of the receptor. However,  
48 flagellins from commensal bacteria induce a range of TLR5 activity (13–15), raising the  
49 question of how the TLR5 response to these flagellins is tuned. To investigate how TLR5  
50 interacts with flagellins from commensal bacteria, we first searched for flagellins commonly  
51 encoded by the healthy human gut microbiome. Flagellin diversity is vast: of the 10 million  
52 proteins encoded by the human gut microbiome, over 5,000 different proteins are classified as

53 flagellins (Methods). The majority of flagellin in the healthy human gut is produced by  
54 *Lachnospiraceae* (16), a prevalent and abundant family of *Firmicutes* that includes beneficial  
55 bacteria such as the butyrate-producers of the *Roseburia* and *Eubacterium* genera (17).  
56 Selecting from the most abundant flagellins observed in 270 healthy individuals (18) (Fig.  
57 S1), we expressed an initial 41 recombinant flagellins (34 belonging to *Lachnospiraceae*  
58 species) and screened these for both TLR5 signaling and TLR5<sup>N14</sup> binding (Fig. S2A,B). Most  
59 of the 41 selected flagellins have TLR5 epitopes whose key residues are either identical to  
60 those of FliC (21/41) or differ at only one position (16/41) (Fig. S2C). In addition to flagellins  
61 from commensals, we included three flagellins from pathogens (FliC, *Vibrio cholerae* FlaB,  
62 and *Listeria monocytogenes* FlaA) and two negative controls (*HpFlaA* and FliC PIM). We  
63 generated AP-tagged flagellins to assay TLR5<sup>N14</sup> binding and separately expressed N-terminal  
64 Myc-tagged flagellins to quantify TLR5 activation. Flagellins were incubated with NF-κB  
65 reporter HEK cells engineered to express TLR5 and NF-κB-dependent AP activity was  
66 measured as a readout for TLR5 activation.

67 Consistent with the notion that binding TLR5 leads to its activation, we generally  
68 observed a positive relationship between TLR5<sup>N14</sup> binding and TLR5 activity (Fig. 1C).  
69 Flagellins that induce a greater response than that of FliC PIM we categorized as ‘stimulators’  
70 (red region in Fig 1C), regardless of their ability to bind TLR5<sup>N14</sup>; this describes nearly half  
71 the flagellins in our screen. ‘Evaders’, in contrast, bind and stimulate more weakly than FliC  
72 PIM (blue region). This group includes *HpFlaA* and 12 commensal-derived flagellins. The  
73 remaining flagellins (9/41) resemble evaders with respect to TLR5 activation (stimulate worse  
74 than FliC PIM) but act like stimulators with regard to TLR5<sup>N14</sup> binding (stronger than FliC  
75 PIM; yellow region). We termed these unexpected ligands ‘silent’ flagellins in reference to  
76 their inability to induce signaling despite intact TLR5 recognition.

77 We further investigated how silent flagellins decouple TLR5 ectodomain binding from  
78 agonism. We selected FlaB from *Roseburia hominis* (*RhFlaB*) as our representative silent

79 flagellin because it binds TLR5<sup>N14</sup> the strongest among the silent flagellins from our initial  
80 screen (Fig. 1C). *R. hominis* is of wide interest, as it is a common gut commensal species  
81 belonging to the *Lachnospiraceae* and generally thought to be anti-inflammatory and thus  
82 beneficial to host health (19). Previous work demonstrated that *R. hominis* is motile and  
83 expresses *RhFlaB* *in vivo* (19, 20). We purified recombinant *RhFlaB* and observed that, in  
84 addition to binding TLR5<sup>N14</sup>, it also binds full-length human TLR5 (Fig. 2A; lane 5). Of note,  
85 FliC binds more full-length TLR5 compared to *RhFlaB*, while the evader *HpFlaA* shows an  
86 equal lack of affinity for both truncated and full-length TLR5 (Fig. 2A). We also validated  
87 that *RhFlaB* is a weaker TLR5 agonist than FliC PIM, despite its intact TLR5 epitope (Fig.  
88 2B; Table S1).

89         Next, we tested if *RhFlaB* binds TLR5 through its TLR5 epitope. We constructed the  
90 flagellin *RhFlaB* PIM, which carries the same mutations as FliC PIM that result in loss of  
91 binding to TLR5<sup>N14</sup>. *RhFlaB* PIM fails to bind the full-length receptor, consistent with TLR5  
92 binding occurring solely at the TLR5 epitope (Fig. 2C; lanes 5-6). However, unlike *RhFlaB*  
93 PIM, FliC PIM shows no reduction in binding to full-length TLR5 (Fig. 2C; lanes 3-4). This  
94 result was unexpected, because FliC PIM does not bind TLR5<sup>N14</sup> ((9), and Fig. 1B).

95         We hypothesized that FliC PIM binds the C-terminal LRRs of the TLR5 ectodomain  
96 at a location allosteric to the site of pattern recognition. While the structure of this region of  
97 TLR5 remains unsolved, the C-terminal LRRs are predicted to interact with the conserved D0  
98 domain of flagellin (Fig. 1A) (21). Notably, the D0 domain is not required for binding  
99 TLR5<sup>N14</sup> (Fig. 1B) and is also absent in the FliC-TLR5 crystal structure (9). Several studies  
100 previously reported the necessity of the FliC D0 for TLR5 activation (9, 11). However, the  
101 mechanism is unclear and the authors unequivocally concluded that the D0 domain does not  
102 directly bind the receptor.

103         We tested for a TLR5 binding site in the FliC D0 using FliC PIM  $\Delta$ D0 and assessing  
104 its binding to full-length TLR5. Since FliC PIM does not bind TLR5<sup>N14</sup>, if the D0 binds TLR5

105 LRRs 15-22, then FliC PIM  $\Delta$ D0 should be unable to bind full-length TLR5. Consistent with  
106 an additional binding site in the D0 of FliC, FliC PIM  $\Delta$ D0 shows a substantial loss of  
107 binding to TLR5 compared to FliC PIM and FliC  $\Delta$ D0 (Fig. 2C; lane 8 vs lanes 4,7). Given  
108 our observation that *RhFlaB* binds TLR5 solely at the epitope, such that *RhFlaB* PIM cannot  
109 bind full-length TLR5, we predicted that the FliC D0 would restore TLR5 binding to *RhFlaB*  
110 PIM. As expected, swapping FliC D0 for the native *RhFlaB* D0 rescues *RhFlaB* PIM binding  
111 (Fig. 2C; lanes 6, 9). Taken together, these results show that FliC D0 allosterically binds  
112 TLR5, in direct contradiction to previous findings (9, 11). The additional binding site also  
113 explains why FliC binds full-length TLR5 more strongly than *RhFlaB* (Fig. 2A).

114         The discovery of an allosteric TLR5 binding site in FliC prompted us to test its impact  
115 on TLR5 activation. We purified recombinant *RhFlaB* chimera expressing the FliC D0  
116 (*RhFlaB*-FliC D0) and assayed TLR5 signaling. As expected from its greater ability to bind  
117 full-length TLR5, the chimeric flagellin is 100-fold more stimulatory than *RhFlaB* with its  
118 native D0 (Fig. 2D). We hypothesized that the additional TLR5 binding site in the FliC D0  
119 increases activity in part by enabling *RhFlaB*-FliC D0 to interact with more TLR5 receptors  
120 than *RhFlaB*.

121         TLR5 activation requires the formation of a symmetric 2:2 flagellin:TLR5 complex  
122 (9, 22). How this complex is assembled remains unclear, although it is widely stated that  
123 flagellin binding induces TLR5 dimerization (11, 23–25). Early cryo-EM work revealed,  
124 however, that human TLR5 forms asymmetric homodimers in the absence of flagellin, a  
125 conformation likely associated with multiple ligand binding sites, and thus a possible target of  
126 the FliC D0 domain (26). We investigated if TLR5 forms unliganded dimers by briefly  
127 treating TLR5-HA HEK cells with the membrane impermeable crosslinker BS<sup>3</sup> (Fig. 2E). In  
128 addition to monomeric TLR5, we detected a higher molecular weight species consistent with  
129 the size of a TLR5 dimer. This result suggests that pre-formed TLR5 dimers are present on

130 the cell surface, in the absence of ligand-induced dimerization that is commonly invoked for  
131 TLR5.

132 We tested the ability of FliC and *RhFlaB* to interact with TLR5 dimers. We observed  
133 that FliC binds both monomer and dimer, while *RhFlaB* only interacts with the monomer  
134 (Fig. 2E; lanes 3,4). The switching out of its native D0 for FliC D0 endows *RhFlaB* the ability  
135 to bind the dimer (Fig. 2E; lane 5). This result suggests that the FliC D0 directly binds the  
136 ectodomain and activates TLR5 signaling in part by mediating binding to preformed TLR5  
137 dimers. This observation supports our hypothesis that an allosteric binding site in its D0  
138 enables FliC to interact with more receptors than *RhFlaB*. Furthermore, the different  
139 oligomeric states of TLR5 targeted by FliC and *RhFlaB* may partially account for the inability  
140 of *RhFlaB* to antagonize FliC (Fig. 2F,G).

141 To assess how widespread silent flagellins are in the healthy human microbiome, we  
142 searched for the peptide sequences of silent flagellins using a published database comprising  
143 more than 33,000 flagellins (Methods). Candidate silent flagellins were selected based on  
144 their presence in human gut metagenomes and by similarity to the C-terminal region of  
145 *RhFlaB* (Fig. S1, S3A). The list was further curated to exclude flagellins containing a basic  
146 residue (R/K) at position *RhFlaB* aa478, based on our observation that *RhFlaB* H478R shows  
147 a slight, but significant, increase in TLR5 stimulation (Fig. S3B,C). The final candidate silent  
148 flagellins are mostly, but not exclusively, from species belonging to the *Lachnospiraceae*  
149 family (75/78) (Fig. 1C,S4).

150 To verify whether these 78 candidate silent flagellins are indeed silent, we expressed  
151 them recombinantly to screen for both TLR5 signaling and TLR5<sup>N14</sup> binding (Fig. 3A).  
152 Compared to our initial screen (Fig. 1C), we were successful in enriching for silent flagellins:  
153 over half (44/78) are weaker TLR5 agonists and stronger TLR5<sup>N14</sup>-binders relative to FliC  
154 PIM (Fig. 3A, yellow region). Given its importance in Crohn's disease, we additionally tested  
155 the flagellin CBir1, whose weak TLR5 agonism has been previously reported (14, 27). CBir1



156 binds TLR5<sup>N14</sup>, categorizing it as a silent flagellin. The remaining 34 candidates are equally  
157 distributed among stimulators (red region) and evaders (blue region).

158 To assess whether the mechanism is the same for *RhFlaB* as for this new set of silent  
159 flagellins, we examined the impact of swapping in the FliC D0 domain on a subset  
160 representing a broad range of TLR5<sup>N14</sup> binding strengths. While the magnitude differs among  
161 candidates, the FliC D0 universally increases TLR5 signaling for all silent flagellins tested,  
162 including CBir1 (Fig. 3B). Moreover, these silent flagellins belong to common taxa of the  
163 human gut microbiome, including multiple species of *Roseburia* (17). The FliC D0 does not  
164 affect TLR5 evasion by *HpFlaA*, consistent with previous observations (11). To identify  
165 residues in the FliC cD0 responsible for increasing TLR5 activity, we looked for regions of  
166 low conservation between FliC and the subset silent flagellins. Substituting three amino acids  
167 in the *RhFlaB* cD0 to the equivalent residues present in FliC increases TLR5 activity by  
168 *RhFlaB* more than 10-fold (Fig. 3C, Table S1).

169 Given that flagellin is facultatively expressed, and that expression in the gut can vary  
170 depending on external factors (13), we assessed the presence of silent flagellins directly from  
171 healthy human stool. Endogenous flagellins were isolated using TLR5 as bait and identified  
172 by mass spectrometry. Peptides were searched against a custom flagellin database built from  
173 metagenome sequences generated from the same stool sample. Of the 12 flagellins identified,  
174 10 are ascribed to *Lachnospiraceae* (Table S2, Data S1.). This is consistent with the  
175 taxonomic affiliation of the abundantly expressed flagellins in healthy humans (18) (Fig.  
176 S5A,B). We recombinantly expressed and purified the top two candidates to assay TLR5  
177 signaling. Both flagellins weakly activate TLR5 with EC<sub>50</sub> values greater than 100 nM (Fig.  
178 3D; Table S1). But, similar to *RhFlaB*, swapping in the FliC D0 for the native D0 profoundly  
179 increases their ability to stimulate TLR5.

180 We further verified that silent recognition occurs when TLR5 is endogenously  
181 expressed. We tested the effect of flagellins in 3D-cultured human colon organoids: FliC



182 stimulates the secretion of IL-8, a pro-inflammatory cytokine produced downstream from  
183 TLR5 activation (Fig. 3E). IL-8 levels in *RhFlaB*-treated organoids are similar to those of  
184 *HpFlaA*- and buffer-treated controls, while organoids incubated with *RhFlaB*-FliC D0  
185 phenocopy FliC-treated organoids. Furthermore, mice injected with *RhFlaB* have lower pro-  
186 inflammatory Cxcl1 cytokine levels compared to animals injected with FliC and *RhFlaB*-FliC  
187 D0 (Fig. 3F). These results indicate that silent recognition of flagellin is not species-specific,  
188 and that the FliC D0 activates both human and mouse endogenously-expressed TLR5.

189         Our discovery of an allosteric activator of TLR5 in FliC suggests a mechanism by  
190 which this receptor can respond to minute levels of stimulatory flagellin. Commensal  
191 members of the gut microbiome, such as members of the *Lachnospiraceae*, can produce an  
192 array of flagellins that are silent, stimulatory, or evasive. *R. hominis* itself expresses several  
193 flagellins that fall into all three categories based on our binding and activation criteria (Fig.  
194 4A; Tables S1,S3) (19). This within-species flagellin diversity reflects the flagellin diversity  
195 encoded broadly in human gut metagenomes, where all three types are detected (Fig. 4B; Fig.  
196 S6). We observed that non-Westernized metagenomes encode a greater proportion of all three  
197 flagellin types compared to Western metagenomes despite lower relative abundance of  
198 *Lachnospiraceae* (Fig. 4C; Fig. S5B-C). Of note, the decrease in flagellin abundance with  
199 Westernization is most pronounced for the silent flagellins (Fig. 4D).

200         The understanding of how TLR5 interacts with its primary ligand, flagellin, has come  
201 mostly from the study of flagellins encoded by the *Pseudomonadota* (formerly  
202 *Proteobacteria*), notably the pathogens *Salmonella* and *H. pylori*, and others such as *E. coli*.  
203 These studies led to the discovery of the TLR5 epitope, a conserved region on the flagellin  
204 nD1, whose binding is considered required for TLR5 recognition and subsequent stimulation.  
205 We show here that, in addition to the TLR5 epitope, the D0 of FliC allosterically binds TLR5,  
206 akin to a homotropic ligand. Our work indicates that in addition to these modes of interaction  
207 (*i.e.* recognition followed by activation versus non-recognition), a third mode, very common

208 in commensal bacteria prevalent in the gut, allows bacteria to express flagellins that retain the  
209 TLR5 epitope without inducing a robust TLR5 response. While commensal bacteria also  
210 produce stimulatory and evasive flagellins (indeed all three types can be encoded in a single  
211 genome), our analysis of metagenomes indicates that silent flagellins are very common in the  
212 healthy human gut, and therefore represent a substantial, previously unappreciated, yet  
213 physiologically relevant population of TLR5 ligands with a novel mode of interaction.

214 Our current model proposes that TLR5 adopts different conformations, as evidenced  
215 by the presence of both monomeric and dimeric TLR5, and that flagellins have different  
216 affinities for these receptor states. While the FliC D0 confers high affinity for dimeric TLR5,  
217 silent flagellins have low affinity for this receptor state and are weak agonists relative to FliC  
218 as a result. However, this low affinity enables silent flagellins to activate TLR5 at high  
219 concentrations, in contrast to *HpFlaA*. Our data further suggests that FliC binding to TLR5  
220 complexes induces a conformational change, rather than receptor dimerization, similarly to  
221 what has been described for other TLRs (28).

222 Together, our work highlights how pattern recognition by TLR5 can occur without  
223 downstream signaling. By probing into the weak agonism of flagellins produced by  
224 commensal gut bacteria, we discovered a third class of flagellins, which contain the epitope  
225 recognized by TLR5 yet poorly activate the receptor. Allosteric activation of TLR5 allows the  
226 host to tolerate silent flagellins from commensal bacteria while remaining responsive to faint  
227 levels of stimulatory flagellin.

## References and Notes

1. C. A. Janeway Jr, Approaching the asymptote? Evolution and revolution in immunology. *Cold Spring Harb. Symp. Quant. Biol.* **54 Pt 1**, 1–13 (1989).
2. I. Botos, D. M. Segal, D. R. Davies, The structural biology of Toll-like receptors. *Structure.* **19**, 447–459 (2011).
3. R. Medzhitov, Toll-like receptors and innate immunity. *Nat. Rev. Immunol.* **1**, 135–145 (2001).
4. B. Chassaing, R. E. Ley, A. T. Gewirtz, Intestinal epithelial cell toll-like receptor 5 regulates the intestinal microbiota to prevent low-grade inflammation and metabolic syndrome in mice. *Gastroenterology.* **147**, 1363–77.e17 (2014).
5. F. Hayashi, K. D. Smith, A. Ozinsky, T. R. Hawn, E. C. Yi, D. R. Goodlett, J. K. Eng, S. Akira, D. M. Underhill, A. Aderem, The innate immune response to bacterial flagellin is mediated by Toll-like receptor 5. *Nature.* **410**, 1099–1103 (2001).
6. S. Maki-Yonekura, K. Yonekura, K. Namba, Conformational change of flagellin for polymorphic supercoiling of the flagellar filament. *Nat. Struct. Mol. Biol.* **17**, 417–422 (2010).
7. K. D. Smith, E. Andersen-Nissen, F. Hayashi, K. Strobe, M. A. Bergman, S. L. R. Barrett, B. T. Cookson, A. Aderem, Toll-like receptor 5 recognizes a conserved site on flagellin required for protofilament formation and bacterial motility. *Nat. Immunol.* **4**, 1247–1253 (2003).
8. M. A. B. Kreutzberger, C. Ewing, F. Poly, F. Wang, E. H. Egelman, Atomic structure of the *Campylobacter jejuni* flagellar filament reveals how  $\epsilon$  Proteobacteria escaped Toll-like receptor 5 surveillance. *Proc. Natl. Acad. Sci. U. S. A.* **117**, 16985–16991 (2020).
9. S.-I. Yoon, O. Kurnasov, V. Natarajan, M. Hong, A. V. Gudkov, A. L. Osterman, I. A. Wilson, Structural basis of TLR5-flagellin recognition and signaling. *Science.* **335**, 859–864 (2012).
10. E. Andersen-Nissen, K. D. Smith, K. L. Strobe, S. L. R. Barrett, B. T. Cookson, S. M. Logan, A. Aderem, Evasion of Toll-like receptor 5 by flagellated bacteria. *Proc. Natl. Acad. Sci. U. S. A.* **102**, 9247–9252 (2005).
11. V. Forstnerič, K. Ivičak-Kocjan, T. Plaper, R. Jerala, M. Benčina, The role of the C-terminal D0 domain of flagellin in activation of Toll like receptor 5. *PLoS Pathog.* **13**, e1006574 (2017).
12. A. T. Gewirtz, Y. Yu, U. S. Krishna, D. A. Israel, S. L. Lyons, R. M. Peek Jr, *Helicobacter pylori* flagellin evades toll-like receptor 5-mediated innate immunity. *J. Infect. Dis.* **189**, 1914–1920 (2004).
13. T. C. Cullender, B. Chassaing, A. Janzon, K. Kumar, C. E. Muller, J. J. Werner, L. T. Angenent, M. E. Bell, A. G. Hay, D. A. Peterson, J. Walter, M. Vijay-Kumar, A. T. Gewirtz, R. E. Ley, Innate and adaptive immunity interact to quench microbiome flagellar motility in the gut. *Cell Host Microbe.* **14**, 571–581 (2013).

14. T. Steiner, S. Ivison, C. Wang, C. Elson, The A4-Fla2 flagellin, a dominant antigen in Crohn's Disease, is a poor TLR5 agonist: P-0163. *Inflamm. Bowel Dis.* **15**, S55 (2009).
15. B. A. Neville, P. O. Sheridan, H. M. B. Harris, S. Coughlan, H. J. Flint, S. H. Duncan, I. B. Jeffery, M. J. Claesson, R. P. Ross, K. P. Scott, P. W. O'Toole, Pro-inflammatory flagellin proteins of prevalent motile commensal bacteria are variably abundant in the intestinal microbiome of elderly humans. *PLoS One.* **8**, e68919 (2013).
16. K. L. Alexander, Q. Zhao, M. Reif, A. F. Rosenberg, P. J. Mannon, L. W. Duck, C. O. Elson, Human Microbiota Flagellins Drive Adaptive Immune Responses in Crohn's Disease. *Gastroenterology* (2021), doi:10.1053/j.gastro.2021.03.064.
17. P. Louis, H. J. Flint, Diversity, metabolism and microbial ecology of butyrate-producing bacteria from the human large intestine. *FEMS Microbiol. Lett.* **294**, 1–8 (2009).
18. J. Lloyd-Price, C. Arze, A. N. Ananthakrishnan, M. Schirmer, J. Avila-Pacheco, T. W. Poon, E. Andrews, N. J. Ajami, K. S. Bonham, C. J. Brislawn, D. Casero, H. Courtney, A. Gonzalez, T. G. Graeber, A. B. Hall, K. Lake, C. J. Landers, H. Mallick, D. R. Plichta, M. Prasad, G. Rahnavard, J. Sauk, D. Shungin, Y. Vázquez-Baeza, R. A. White 3rd, IBDMDB Investigators, J. Braun, L. A. Denson, J. K. Jansson, R. Knight, S. Kugathasan, D. P. B. McGovern, J. F. Petrosino, T. S. Stappenbeck, H. S. Winter, C. B. Clish, E. A. Franzosa, H. Vlamakis, R. J. Xavier, C. Huttenhower, Multi-omics of the gut microbial ecosystem in inflammatory bowel diseases. *Nature.* **569**, 655–662 (2019).
19. A. M. Patterson, I. E. Mulder, A. J. Travis, A. Lan, N. Cerf-Bensussan, V. Gaboriau-Routhiau, K. Garden, E. Logan, M. I. Delday, A. G. P. Coutts, E. Monnais, V. C. Ferraria, R. Inoue, G. Grant, R. I. Aminov, Human Gut Symbiont *Roseburia hominis* Promotes and Regulates Innate Immunity. *Front. Immunol.* **8**, 1166 (2017).
20. S. H. Duncan, R. I. Aminov, K. P. Scott, P. Louis, T. B. Stanton, H. J. Flint, Proposal of *Roseburia faecis* sp. nov., *Roseburia hominis* sp. nov. and *Roseburia inulinivorans* sp. nov., based on isolates from human faeces. *Int. J. Syst. Evol. Microbiol.* **56**, 2437–2441 (2006).
21. S. N. Klimosch, A. Försti, J. Eckert, J. Knezevic, M. Bevier, W. von Schönfels, N. Heits, J. Walter, S. Hinz, J. Lascorz, J. Hampe, D. Hartl, J.-S. Frick, K. Hemminki, C. Schafmayer, A. N. R. Weber, Functional TLR5 genetic variants affect human colorectal cancer survival. *Cancer Res.* **73**, 7232–7242 (2013).
22. K. Ivičak-Kocjan, G. Panter, M. Benčina, R. Jerala, Determination of the physiological 2:2 TLR5:flagellin activation stoichiometry revealed by the activity of a fusion receptor. *Biochem. Biophys. Res. Commun.* **435**, 40–45 (2013).
23. M.-H. Khani, M. Bagheri, A. Dehghanian, A. Zahmatkesh, S. Moradi Bidhendi, Z. Salehi Najafabadi, R. Banihashemi, Effect of C-Terminus Modification in *Salmonella typhimurium* FliC on Protein Purification Efficacy and Bioactivity. *Mol. Biotechnol.* **61**, 12–19 (2019).
24. I. A. Hajam, P. A. Dar, I. Shahnawaz, J. C. Jaume, J. H. Lee, Bacterial flagellin-a potent immunomodulatory agent. *Exp. Mol. Med.* **49**, e373 (2017).
25. A. H. López-Yglesias, X. Zhao, E. K. Quarles, M. A. Lai, T. VandenBos, R. K. Strong, K. D. Smith, Flagellin induces antibody responses through a TLR5- and inflammasome-independent pathway. *J. Immunol.* **192**, 1587–1596 (2014).

26. K. Zhou, R. Kanai, P. Lee, H.-W. Wang, Y. Modis, Toll-like receptor 5 forms asymmetric dimers in the absence of flagellin. *J. Struct. Biol.* **177**, 402–409 (2012).
27. M. J. Lodes, Y. Cong, C. O. Elson, R. Mohamath, C. J. Landers, S. R. Targan, M. Fort, R. M. Hershberg, Bacterial flagellin is a dominant antigen in Crohn disease. *J. Clin. Invest.* **113**, 1296–1306 (2004).
28. E. Latz, A. Verma, A. Visintin, M. Gong, C. M. Sirois, D. C. G. Klein, B. G. Monks, C. J. McKnight, M. S. Lamphier, W. P. Duprex, T. Espevik, D. T. Golenbock, Ligand-induced conformational changes allosterically activate Toll-like receptor 9. *Nat. Immunol.* **8**, 772–779 (2007).
29. D. Hu, P. R. Reeves, The Remarkable Dual-Level Diversity of Prokaryotic Flagellins. *mSystems*. **5** (2020), doi:10.1128/mSystems.00705-19.
30. P. Jones, D. Binns, H.-Y. Chang, M. Fraser, W. Li, C. McAnulla, H. McWilliam, J. Maslen, A. Mitchell, G. Nuka, S. Pesseat, A. F. Quinn, A. Sangrador-Vegas, M. Scheremetjew, S.-Y. Yong, R. Lopez, S. Hunter, InterProScan 5: genome-scale protein function classification. *Bioinformatics*. **30**, 1236–1240 (2014).
31. S. Sherrill-Mix, Functions to Work with NCBI Accessions and Taxonomy [R package taxonomizr version 0.8.0] (2021) (available at <https://CRAN.R-project.org/package=taxonomizr>).
32. J. Kans, *Entrez Direct: E-utilities on the Unix Command Line* (National Center for Biotechnology Information (US), 2022).
33. D. A. Benson, M. Cavanaugh, K. Clark, I. Karsch-Mizrachi, J. Ostell, K. D. Pruitt, E. W. Sayers, GenBank. *Nucleic Acids Res.* **46**, D41–D47 (2018).
34. F. Keck, F. Rimet, A. Bouchez, A. Franc, phylosignal: an R package to measure, test, and explore the phylogenetic signal. *Ecol. Evol.* **6**, 2774–2780 (2016).
35. S. W. Kembel, P. D. Cowan, M. R. Helmus, W. K. Cornwell, H. Morlon, D. D. Ackerly, S. P. Blomberg, C. O. Webb, Picante: R tools for integrating phylogenies and ecology. *Bioinformatics*. **26**, 1463–1464 (2010).
36. E. A. Franzosa, L. J. McIver, G. Rahnavard, L. R. Thompson, M. Schirmer, G. Weingart, K. S. Lipson, R. Knight, J. G. Caporaso, N. Segata, C. Huttenhower, Species-level functional profiling of metagenomes and metatranscriptomes. *Nat. Methods*. **15**, 962–968 (2018).
37. D. H. Parks, M. Chuvochina, D. W. Waite, C. Rinke, A. Skarshewski, P.-A. Chaumeil, P. Hugenholtz, A standardized bacterial taxonomy based on genome phylogeny substantially revises the tree of life. *Nat. Biotechnol.* **36**, 996–1004 (2018).
38. B. Buchfink, C. Xie, D. H. Huson, Fast and sensitive protein alignment using DIAMOND. *Nat. Methods*. **12**, 59–60 (2015).
39. E. A. Franzosa, A. Sirota-Madi, J. Avila-Pacheco, N. Fornelos, H. J. Haiser, S. Reinker, T. Vatanen, A. B. Hall, H. Mallick, L. J. McIver, J. S. Sauk, R. G. Wilson, B. W. Stevens, J. M. Scott, K. Pierce, A. A. Deik, K. Bullock, F. Imhann, J. A. Porter, A. Zhernakova, J. Fu, R. K. Weersma, C. Wijmenga, C. B. Clish, H. Vlamakis, C. Huttenhower, R. J. Xavier, Gut

- microbiome structure and metabolic activity in inflammatory bowel disease. *Nat Microbiol.* **4**, 293–305 (2019).
40. W. Li, A. Godzik, Cd-hit: a fast program for clustering and comparing large sets of protein or nucleotide sequences. *Bioinformatics.* **22**, 1658–1659 (2006).
  41. L. Fu, B. Niu, Z. Zhu, S. Wu, W. Li, CD-HIT: accelerated for clustering the next-generation sequencing data. *Bioinformatics.* **28**, 3150–3152 (2012).
  42. E. Pasolli, L. Schiffer, P. Manghi, A. Renson, V. Obenchain, D. T. Truong, F. Beghini, F. Malik, M. Ramos, J. B. Dowd, C. Huttenhower, M. Morgan, N. Segata, L. Waldron, Accessible, curated metagenomic data through ExperimentHub. *Nat. Methods.* **14**, 1023–1024 (2017).
  43. M. Torchiano, Efficient Effect Size Computation [R package effsize version 0.8.1] (2020) (available at <https://CRAN.R-project.org/package=effsize>).
  44. F. Weissmann, G. Petzold, R. VanderLinden, P. J. Huis In 't Veld, N. G. Brown, F. Lampert, S. Westermann, H. Stark, B. A. Schulman, J.-M. Peters, biGBac enables rapid gene assembly for the expression of large multisubunit protein complexes. *Proc. Natl. Acad. Sci. U. S. A.* **113**, E2564–9 (2016).
  45. C. Bieniossek, T. Imasaki, Y. Takagi, I. Berger, MultiBac: expanding the research toolbox for multiprotein complexes. *Trends Biochem. Sci.* **37**, 49–57 (2012).
  46. E. Smakowska-Luzan, G. A. Mott, K. Parys, M. Stegmann, T. C. Howton, M. Layeghifard, J. Neuhold, A. Lehner, J. Kong, K. Grünwald, N. Weinberger, S. B. Satbhai, D. Mayer, W. Busch, M. Madalinski, P. Stolt-Bergner, N. J. Provart, M. S. Mukhtar, C. Zipfel, D. Desveaux, D. S. Guttman, Y. Belkhadir, An extracellular network of Arabidopsis leucine-rich repeat receptor kinases. *Nature.* **553**, 342–346 (2018).
  47. K. Parys, N. R. Colaianni, H.-S. Lee, U. Hohmann, N. Edelbacher, A. Trgovcevic, Z. Blahovska, D. Lee, A. Mechtler, Z. Muhari-Portik, M. Madalinski, N. Schandry, I. Rodríguez-Arévalo, C. Becker, E. Sonnleitner, A. Korte, U. Bläsi, N. Geldner, M. Hothorn, C. D. Jones, J. L. Dangl, Y. Belkhadir, Signatures of antagonistic pleiotropy in a bacterial flagellin epitope. *Cell Host Microbe.* **29** (2021), pp. 620–634.e9.
  48. B. Buchfink, K. Reuter, H.-G. Drost, Sensitive protein alignments at tree-of-life scale using DIAMOND. *Nat. Methods.* **18**, 366–368 (2021).
  49. N. Borchert, C. Dieterich, K. Krug, W. Schütz, S. Jung, A. Nordheim, R. J. Sommer, B. Macek, Proteogenomics of *Pristionchus pacificus* reveals distinct proteome structure of nematode models. *Genome Res.* **20**, 837–846 (2010).
  50. J. Rappsilber, M. Mann, Y. Ishihama, Protocol for micro-purification, enrichment, pre-fractionation and storage of peptides for proteomics using StageTips. *Nat. Protoc.* **2**, 1896–1906 (2007).
  51. M. Schmitt, T. Sinnberg, K. Bratl, K. Zittlau, C. Garbe, B. Macek, N. C. Nalpas, Proteogenomics Reveals Perturbed Signaling Networks in Malignant Melanoma Cells Resistant to BRAF Inhibition. *Mol. Cell. Proteomics.* **20**, 100163 (2021).



52. J. Cox, M. Mann, MaxQuant enables high peptide identification rates, individualized p.p.b.-range mass accuracies and proteome-wide protein quantification. *Nat. Biotechnol.* **26**, 1367–1372 (2008).
53. J. Cox, N. Neuhauser, A. Michalski, R. A. Scheltema, J. V. Olsen, M. Mann, Andromeda: a peptide search engine integrated into the MaxQuant environment. *J. Proteome Res.* **10**, 1794–1805 (2011).
54. J. E. Elias, S. P. Gygi, Target-decoy search strategy for increased confidence in large-scale protein identifications by mass spectrometry. *Nat. Methods.* **4**, 207–214 (2007).
55. B. Schwanhäusser, D. Busse, N. Li, G. Dittmar, J. Schuchhardt, J. Wolf, W. Chen, M. Selbach, Global quantification of mammalian gene expression control. *Nature.* **473**, 337–342 (2011).
56. H. Miyoshi, T. S. Stappenbeck, In vitro expansion and genetic modification of gastrointestinal stem cells in spheroid culture. *Nat. Protoc.* **8**, 2471–2482 (2013).
57. F. Mölder, K. P. Jablonski, B. Letcher, M. B. Hall, C. H. Tomkins-Tinch, V. Sochat, J. Forster, S. Lee, S. O. Twardziok, A. Kanitz, A. Wilm, M. Holtgrewe, S. Rahmann, S. Nahnsen, J. Köster, Sustainable data analysis with Snakemake. *F1000Res.* **10**, 33 (2021).
58. Anaconda Software Distribution. *Anaconda Documentation* (2020), (available at <https://docs.anaconda.com/>).
59. R Core Team, R: A Language and Environment for Statistical Computing (2018), (available at <https://www.R-project.org/>).
60. H. Wickham, R. François, L. Henry, K. Müller, dplyr: A Grammar of Data Manipulation (2021), (available at <https://CRAN.R-project.org/package=dplyr>).
61. H. Wickham, tidyr: Tidy Messy Data (2021), (available at <https://CRAN.R-project.org/package=tidyr>).
62. H. Wickham, ggplot2: Elegant Graphics for Data Analysis (2016), (available at <https://ggplot2.tidyverse.org>).
63. A. Kassambara, ggpubr: “ggplot2” Based Publication Ready Plots (2020), (available at <https://CRAN.R-project.org/package=ggpubr>).
64. L. L. C. Schrödinger, W. DeLano, *PyMOL* (2020; <http://www.pymol.org/pymol>).



**Acknowledgments:** Human colon organoids were from the Stanford Tissue Bank and kindly provided by Julia Y. Co from the laboratories of Manuel R. Amieva and Denise Monack. We thank Irina Droste-Borel and Boris Macek from the Proteome Center Tuebingen, Christa Lanz and Oliver Weichenrieder from the Genome Center at the MPI for Biology, and Ivan Hang and Jana Neuhold at the Vienna Biocenter Core Facilities (VBCF ProTech).

**Funding:** This work was supported by the Max Planck Society and grants from the Austrian Academy of Science through the Gregor Mendel Institute and the Vienna Science and Technology Fund Project (LS17-047) (Y.B).

**Author contributions:**

Conceptualization: SJC, REL

Methodology: SJC, MB, AB, KP, ZMH, JCZ, NDY, REL

Investigation: SJC, MB, JCZ, AB, ZMH, KP, JZ, NDY

Visualization: SJC, NDY, AB

Supervision: NDY, REL

Resources: DL, ZMH, YB, ATG, REL

Writing – original draft: SJC, JCZ, AB, NDY, DL, ATG, REL

**Competing interests:** Authors declare that they have no competing interests.

**Data and materials availability:**

The raw sequence data of the sample used for proteomics analysis are available from the European Nucleotide Archive under study accession number PRJEB47632. Proteomics data are available from the Proteomics Identification Database (accession number pending).

**Supplementary Materials:**

Methods and Materials

Figs. S1 to S6

Tables S1 to S3

Data S1 to S2

References (29–64)

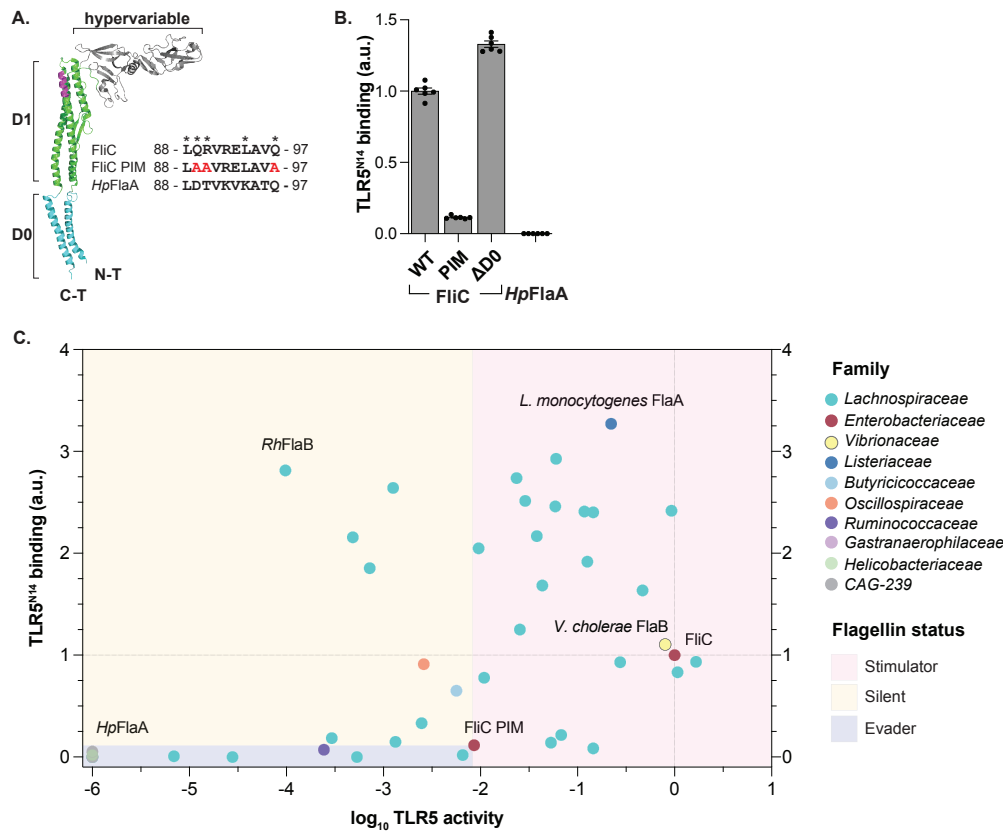

228 **Fig. 1. Flagellins from human gut commensals are silently recognized by TLR5.** (A)  
 229 Crystal structure of FliC (PDB 3A5X from (6)) and multiple sequence alignment of nD1  
 230 TLR5 epitope (colored magenta in structure) from *Salmonella* and *H. pylori* flagellins.  
 231 Asterisks denote residues in FliC required for TLR5 recognition; residues mutated in FliC  
 232 PIM are colored red. (B) Flagellin binding to truncated TLR5 ectodomain: TLR5<sup>N14</sup> bait was  
 233 incubated with AP-tagged flagellins followed by quantification of AP activity. Error bars are  
 234 SEM for  $n=6$ ; data shown represent two independent experiments. (C) Plot of TLR5 activity  
 235 vs TLR5<sup>N14</sup> binding for 41 flagellins abundant in the healthy human gut microbiome (see Fig.  
 236 S1) as well as flagellins from pathogens. Circles represent individual flagellins and are  
 237 colored by family-level taxonomy (GTDB). TLR5<sup>N14</sup> binding was performed as described in  
 238 B; data shown represent mean for  $n \geq 3$ . TLR5 activity was measured using TLR5 HEK-Blue  
 239 cells and represents negative EC<sub>50</sub> normalized to flagellin expression in bacterial lysates. Data

240 represent mean from three independent experiments. All values are normalized to FliC.  
241 Flagellin status is defined relative to FliC PIM: stimulators are more active, silent flagellins  
242 are less active with higher affinity for TLR5<sup>N14</sup>, and evaders are less active with lower affinity  
243 for TLR5<sup>N14</sup>.  
244  
245  
246  
247  
248  
249

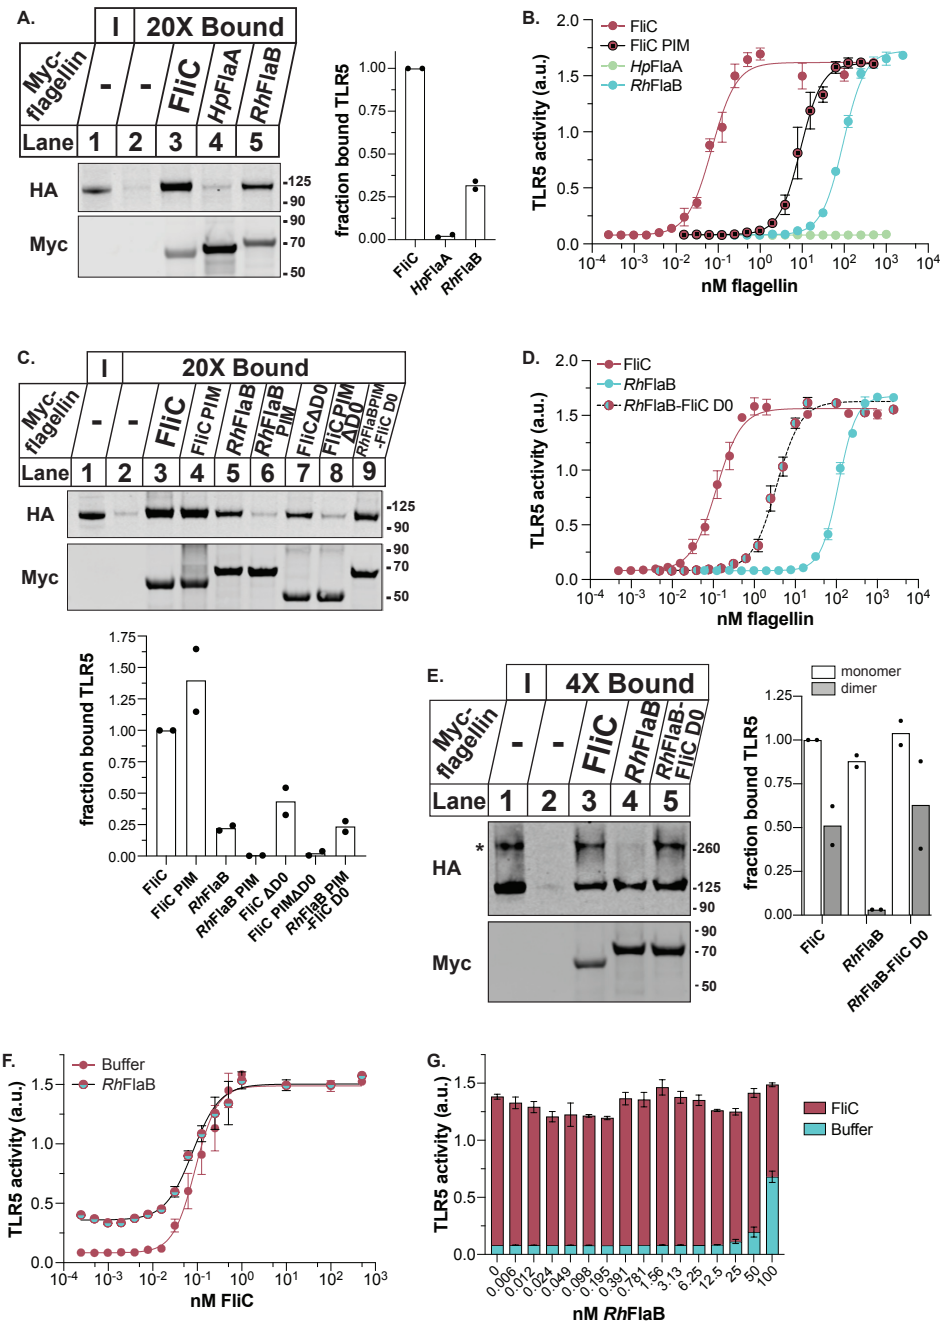

250 **Fig. 2. Silent flagellin *RhFlaB* lacks TLR5 binding site in D0.** (A) Flagellin binding to full-  
 251 length TLR5: TLR5-HA HEK cell lysates were incubated with 6xHis-Myc-tagged flagellins  
 252 followed by purification on Talon beads. Input ('I') and bound fractions ('20X Bound') were  
 253 analyzed by immunoblot using antibodies against HA and Myc. *Left*: representative blots  
 254 from one of two independent experiments; *right*: quantification of HA signal in bound lanes

255 relative to Myc signal, normalized to FliC. **(B)** *RhFlaB*-dependent TLR5 activity: TLR5  
256 HEK-Blue cells were incubated with purified recombinant flagellins for 18 hr and NF- $\kappa$ B-  
257 dependent AP levels in medium were quantified. Error bars are SEM for  $n=3$ ; data shown  
258 represent one of at least two independent experiments. Curve-fitting by weighted, non-linear  
259 regression analysis. **(C)** Mapping TLR5 binding sites in flagellin: TLR5-HA HEK cell lysates  
260 were incubated with 6xHis-Myc-tagged flagellins and processed as described in (A). *Top*:  
261 representative blots from one of two independent experiments; *bottom*: quantification of HA  
262 signal relative to Myc signal. **(D)** *RhFlaB* chimera-dependent activation of TLR5: TLR5  
263 HEK-Blue cells were incubated with purified recombinant flagellins as described in (B). **(E)**  
264 Flagellin binding to preformed TLR5 complexes: TLR5-HA HEK cells were treated with BS<sup>3</sup>  
265 crosslinker prior to lysis then processed as described in (A). Asterisk indicates TLR5 dimer  
266 band. Quantification normalized to HA monomer bound to FliC. **(F, G)** FliC-dependent TLR5  
267 activity in the presence of *RhFlaB*: TLR5 HEK-Blue cells were exposed to 10 nM *RhFlaB* (F)  
268 or 50 pM FliC (G) and buffer controls (superimposed in G) prior to the addition of flagellins  
269 at indicated concentrations and processed as described in (B).

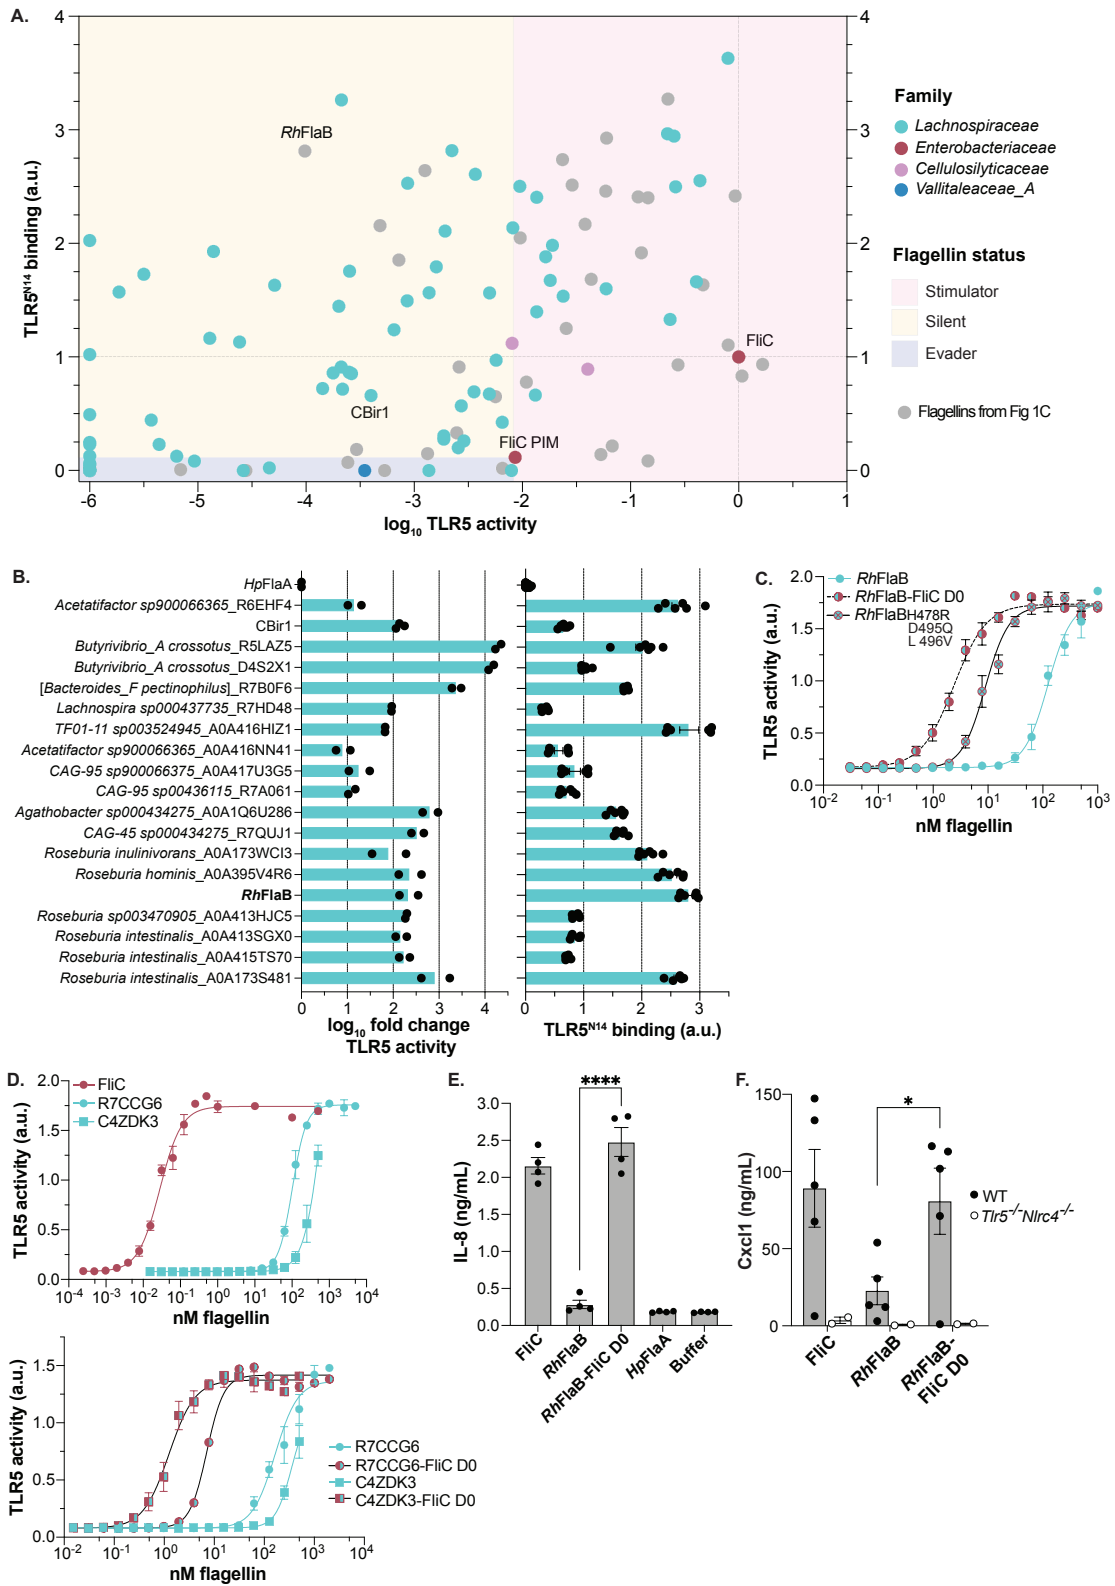



270 **Fig. 3. Silent flagellins are widespread among *Lachnospiraceae* that colonize the human**  
271 **gut. (A)** Plotted are TLR5 activity vs TLR5<sup>N14</sup> binding for flagellins with *RhFlaB*-like C-  
272 terminal region: Each circle represents an individual flagellin and is colored by family-level  
273 taxonomy (GTDB); gray circles represent flagellins previously shown in Fig. 1C. TLR5<sup>N14</sup>  
274 binding by AP-tagged candidates was performed as described in Fig.1; data shown represent  
275 mean for  $n \geq 3$ . TLR5 activity was calculated as described in Fig. 1C. Data represent mean  
276 from three independent experiments. All values are relative to FliC. See also Fig. S4. **(B)**  
277 Effect of FliC D0 on TLR5 activity: Native D0 domain was swapped for FliC D0 in a subset  
278 of *Lachnospiraceae* silent flagellins to generate chimeras, and TLR5 activity was measured as  
279 described in (A). Bar graph represents mean difference between wild-type and chimeric  
280 flagellin activity from at least two independent experiments. TLR5<sup>N14</sup> binding of subset silent  
281 flagellins shown on right. **(C)** Effect of Flagellin cD0 residues on TLR5 activity: *RhFlaB* cD0  
282 was mutated at three sites to express residues present in FliC cD0, recombinantly purified,  
283 incubated with TLR5 HEK-Blue cells, and processed as described in Fig. 2B. **(D)** Activation  
284 of TLR5 by flagellins from human stool: Top two flagellins identified by proteomics were  
285 recombinantly purified and incubated with TLR5 HEK-Blue cells as described in Fig. 2B. See  
286 Tables S1, S2 and Data S1. **(E)** Flagellin-dependent responses in colonoids: Organoids  
287 derived from human colon were incubated with flagellins (10 nM) or buffer control for 18 hr.  
288 IL-8 levels in culture media were quantified by ELISA. Data shown represent mean  $\pm$  SEM  
289 from one of two independent experiments. Significance between *RhFlaB* and *RhFlaB*-FliC D0  
290 means was determined by unpaired, two-tailed t test (\*\*\*\* $P < 0.0001$ ). **(F)** TLR5-dependent  
291 responses in mice: Wild-type and *Tlr5*<sup>-/-</sup>*Nlrc4*<sup>-/-</sup> mice were treated with indicated flagellins (10  
292 ug) by intraperitoneal injection and Cxcl1 levels in blood were measured by ELISA.  
293 Significance between *RhFlaB* and *RhFlaB*-FliC D0 means was determined by unpaired, two-  
294 tailed t test (\* $P < 0.05$ ).

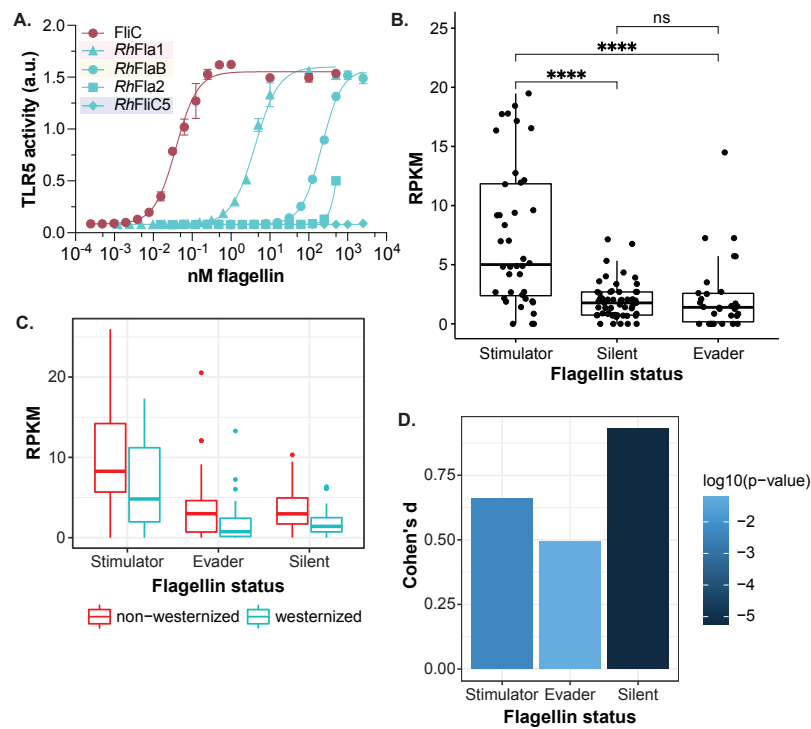

295  
296 **Fig. 4. Silent flagellins are enriched in non-Westernized populations.** (A) Within-species  
297 flagellin diversity: Flagellins encoded by *R. hominis* (Table S3) were recombinantly purified  
298 and incubated with TLR5 HEK-Blue cells as described in Fig. 2B. Flagellins are shaded to  
299 reflect status (Fig 3A, S2). See also Table S1. (B) Abundance of stimulator, silent, and evader  
300 flagellins: Boxplots show median reads per kilobase per million reads (RPKM) of flagellins in  
301 human metagenomes ( $n=1783$ ). Significance determined by post hoc pairwise t-tests  
302 (ANOVA, type II,  $F = 25.3$ ,  $P = 6.8e-10$ ). (\*\*\*\* $P < 0.0001$ ; ns, not significant). See Fig. S6.  
303 (C) Median RPKM of flagellins by westernization status and flagellin status: See Fig. S6 and  
304 Data S2. (D) Effect sizes (Cohen's D) and t-test P-values corresponding to westernization  
305 versus non-westernization comparisons within each flagellin status.
